# Supplementary material for: The Million Veteran Program 1990–1991 Gulf War Era Survey: An Evaluation of Veteran Response, Characteristics, and Representativeness of the Gulf War Era Veteran Population
Source: MDPI journal article supplement (doi:10.3390/ijerph21010072), 2024-01-08
Supplement: s1 [file s1]

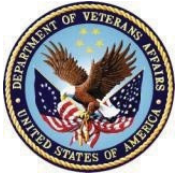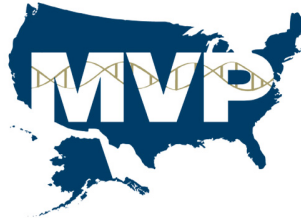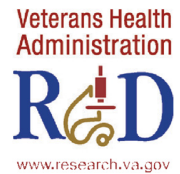

# 1990-1991 GULF WAR ERA SURVEY

The following questions ask about your military experience during the 1990-1991 Gulf War Era, regardless of whether you were deployed or not; the questions also ask about your health history and medication use.

By completing all or some of these questions, you are voluntarily consenting to participate in this survey.

## Questionnaire Instructions:

We would like you to answer all of the questions on the following pages as completely as possible.

You are free to skip questions without any penalty or prejudice.

- Please fill in the circle completely.

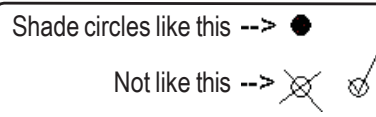

- It is best to use black or blue ink pen when completing this questionnaire. Please do not use a pencil, marker, or felt tip pen.
- If you are unsure about how to answer a question, please give the best answer you can.
- Answer each question, unless you are asked to skip to another question.
- Fill in only one answer circle for each question, unless it tells you to "Fill in all that apply."
- Please do not draw a line through any boxes that are left blank or not applicable.
- When you are finished, please place the questionnaire in the enclosed postage-paid envelope and place in the mail.

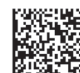

1. What is today's date?

|    |  |   |    |  |   |      |  |  |  |
|----|--|---|----|--|---|------|--|--|--|
|    |  | / |    |  | / |      |  |  |  |
| mm |  |   | dd |  |   | yyyy |  |  |  |

2. What is your date of birth?

|    |  |   |    |  |   |      |  |  |  |
|----|--|---|----|--|---|------|--|--|--|
|    |  | / |    |  | / |      |  |  |  |
| mm |  |   | dd |  |   | yyyy |  |  |  |

3. What is your gender?

- ☐ Male  
☐ Female

4. Are you Spanish, Hispanic, or Latino?  
(Fill in all that apply)

- ☐ No, not Spanish, Hispanic, Latino  
☐ Yes, Mexican, Mexican American, Chicano  
☐ Yes, Puerto Rican  
☐ Yes, Cuban  
☐ Yes, other Spanish, Hispanic, Latino

5. What is your race? (Fill in all that apply)

- ☐ White  
☐ Black/African-American  
☐ American Indian/Alaska Native  
☐ Chinese  
☐ Japanese  
☐ Asian Indian  
☐ Other Asian  
☐ Filipino  
☐ Pacific Islander  
☐ Other: \_\_\_\_\_

6. Where are your ancestors originally from? (Fill in all that apply)

- ☐ Africa  
☐ East Asia/Pacific Ocean region  
☐ Middle East  
☐ North America  
☐ Northern Europe  
☐ Southern Europe  
☐ South America  
☐ Southwest Asia  
☐ (Don't Know)

7. Did you serve in the military during the 1990-1991 Gulf War Era?

☐ Yes

☐ No → Please stop and return the questionnaire in the enclosed envelope. Thank you!

8. During the 1990-1991 Gulf War Era, which branch(es) of the military did you serve?  
(Fill in all that apply)

- ☐ Army  
☐ Navy  
☐ Air Force  
☐ Marine Corps  
☐ Coast Guard  
☐ National Guard  
☐ Merchant Marines  
☐ NOAA  
☐ Public Health Services

9. Did you deploy at any time to the Persian Gulf Region during the 1990-1991 Gulf War Era?

☐ Yes

☐ No → Skip to question 14

10. In what month and year did you first arrive in the Persian Gulf Region?

|       |  |   |      |  |  |  |
|-------|--|---|------|--|--|--|
|       |  | / |      |  |  |  |
| Month |  |   | Year |  |  |  |

11. In what month and year did you last leave the Persian Gulf Region?

|       |  |   |      |  |  |  |
|-------|--|---|------|--|--|--|
|       |  | / |      |  |  |  |
| Month |  |   | Year |  |  |  |

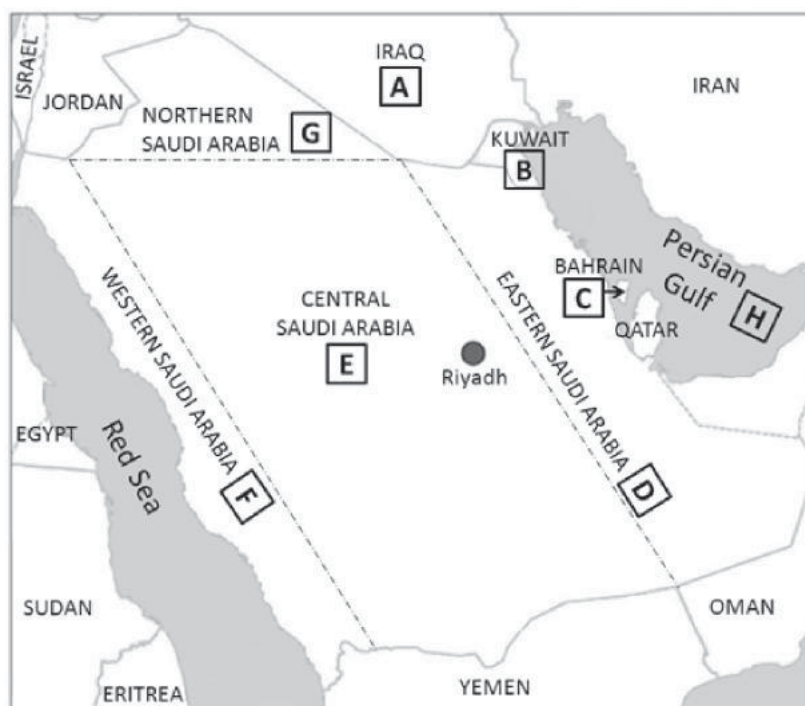

| 12. While you were in the Persian Gulf Region, were you ever located in...?<br>(Fill in No or Yes for each) |                          |                             | IF YES:<br>About how many days? |                       |                       |
|-------------------------------------------------------------------------------------------------------------|--------------------------|-----------------------------|---------------------------------|-----------------------|-----------------------|
|                                                                                                             | No                       | Yes                         | 1-6 days                        | 7-30 days             | 31 days or more       |
| a. Iraq (area A on map)                                                                                     | <input type="radio"/> No | <input type="radio"/> Yes → | <input type="radio"/>           | <input type="radio"/> | <input type="radio"/> |
| b. Kuwait (area B on map)                                                                                   | <input type="radio"/> No | <input type="radio"/> Yes → | <input type="radio"/>           | <input type="radio"/> | <input type="radio"/> |
| c. Bahrain (area C on map)                                                                                  | <input type="radio"/> No | <input type="radio"/> Yes → | <input type="radio"/>           | <input type="radio"/> | <input type="radio"/> |
| d. Saudi Arabia: Eastern area (area D on map)                                                               | <input type="radio"/> No | <input type="radio"/> Yes → | <input type="radio"/>           | <input type="radio"/> | <input type="radio"/> |
| e. Saudi Arabia: Central area (area E on map)                                                               | <input type="radio"/> No | <input type="radio"/> Yes → | <input type="radio"/>           | <input type="radio"/> | <input type="radio"/> |
| f. Saudi Arabia: Western area (area F on map)                                                               | <input type="radio"/> No | <input type="radio"/> Yes → | <input type="radio"/>           | <input type="radio"/> | <input type="radio"/> |
| g. Saudi Arabia: Northern area (area G on map)                                                              | <input type="radio"/> No | <input type="radio"/> Yes → | <input type="radio"/>           | <input type="radio"/> | <input type="radio"/> |
| h. At sea: in the Persian Gulf (area H on map)                                                              | <input type="radio"/> No | <input type="radio"/> Yes → | <input type="radio"/>           | <input type="radio"/> | <input type="radio"/> |
| i. At sea: other location<br><input type="text"/>                                                           | <input type="radio"/> No | <input type="radio"/> Yes → | <input type="radio"/>           | <input type="radio"/> | <input type="radio"/> |
| j. Other location<br><input type="text"/>                                                                   | <input type="radio"/> No | <input type="radio"/> Yes → | <input type="radio"/>           | <input type="radio"/> | <input type="radio"/> |

| 13. While you were in the Persian Gulf Region, did you experience any of the following? |                                   |                          |                             | IF YES:<br>About how many days? |                       |                       |
|-----------------------------------------------------------------------------------------|-----------------------------------|--------------------------|-----------------------------|---------------------------------|-----------------------|-----------------------|
|                                                                                         | Not<br>Sure                       | No                       | Yes                         | 1-6<br>days                     | 7-30<br>days          | 31 days<br>or more    |
| a. Entered Iraq                                                                         | <input type="radio"/> Not<br>Sure | <input type="radio"/> No | <input type="radio"/> Yes → | <input type="radio"/>           | <input type="radio"/> | <input type="radio"/> |
| b. Entered Kuwait                                                                       | <input type="radio"/> Not<br>Sure | <input type="radio"/> No | <input type="radio"/> Yes → | <input type="radio"/>           | <input type="radio"/> | <input type="radio"/> |
| c. Served on board a ship                                                               | <input type="radio"/> Not<br>Sure | <input type="radio"/> No | <input type="radio"/> Yes → | <input type="radio"/>           | <input type="radio"/> | <input type="radio"/> |
| d. Close proximity to smoke from oil well fires                                         | <input type="radio"/> Not<br>Sure | <input type="radio"/> No | <input type="radio"/> Yes → | <input type="radio"/>           | <input type="radio"/> | <input type="radio"/> |
| e. Directly involved in ground combat                                                   | <input type="radio"/> Not<br>Sure | <input type="radio"/> No | <input type="radio"/> Yes → | <input type="radio"/>           | <input type="radio"/> | <input type="radio"/> |
| f. Took pyridostigmine bromide (anti-nerve agent pills)                                 | <input type="radio"/> Not<br>Sure | <input type="radio"/> No | <input type="radio"/> Yes → | <input type="radio"/>           | <input type="radio"/> | <input type="radio"/> |
| g. Exposed to chemical or biological warfare agents                                     | <input type="radio"/> Not<br>Sure | <input type="radio"/> No | <input type="radio"/> Yes → | <input type="radio"/>           | <input type="radio"/> | <input type="radio"/> |
| h. Worked with prisoners of war                                                         | <input type="radio"/> Not<br>Sure | <input type="radio"/> No | <input type="radio"/> Yes → | <input type="radio"/>           | <input type="radio"/> | <input type="radio"/> |
| i. Used pesticide cream or liquid on your skin                                          | <input type="radio"/> Not<br>Sure | <input type="radio"/> No | <input type="radio"/> Yes → | <input type="radio"/>           | <input type="radio"/> | <input type="radio"/> |
| j. Wore a uniform treated with pesticides                                               | <input type="radio"/> Not<br>Sure | <input type="radio"/> No | <input type="radio"/> Yes → | <input type="radio"/>           | <input type="radio"/> | <input type="radio"/> |
| k. Used insect baits/no-pest strips in your living area                                 | <input type="radio"/> Not<br>Sure | <input type="radio"/> No | <input type="radio"/> Yes → | <input type="radio"/>           | <input type="radio"/> | <input type="radio"/> |

14. Did you deploy in support of Operation Enduring Freedom (OEF) or Operation Iraqi Freedom (OIF) (September 2001 or later)?

- ☐ Yes
- ☐ No

15. Were you ever exposed to Agent Orange?

- ☐ Yes
- ☐ No
- ☐ Not Sure

16. Were you ever given the Anthrax vaccine?

- ☐ Yes
- ☐ No
- ☐ Not Sure

#### Health and Other Status

17. What is the highest degree or level of school you have completed?

- ☐ Less than high school
- ☐ High school diploma/GED
- ☐ Some college credit, but no degree
- ☐ Associate's degree (e.g., AA, AS)
- ☐ Bachelor's degree (e.g., BA, BS)
- ☐ Master's degree (e.g., MA, MS, MBA)
- ☐ Professional or Doctorate degree

18. What is your current marital status?

- ☐ Married
- ☐ Civil commitment
- ☐ Cohabiting
- ☐ Separated
- ☐ Divorced
- ☐ Widowed
- ☐ Never married

19. Including yourself, how many people currently live in your household?

- |                       |                       |                       |                       |                       |                       |                       |                       |                       |
|-----------------------|-----------------------|-----------------------|-----------------------|-----------------------|-----------------------|-----------------------|-----------------------|-----------------------|
| 1                     | 2                     | 3                     | 4                     | 5                     | 6                     | 7                     | 8                     | 9+                    |
| <input type="radio"/> |

20a. In the **PAST YEAR**, about how much of your health care did you get at a VA facility (e.g., doctor's visits, hospitalizations, urgent care visits or counseling)?

- ☐ None
- ☐ 1 – 25%
- ☐ 26 – 50%
- ☐ 51 – 75%
- ☐ 76 – 99%
- ☐ 100%

20b. In the **PAST YEAR**, how many times were you a patient in a VA Healthcare Facility overnight or longer?

- ☐ None
- ☐ 1 – 3
- ☐ 4 – 6
- ☐ 7 – 9
- ☐ 10 or more

20c. In the **PAST YEAR**, how many times were you a patient in a **Non-VA** Healthcare Facility overnight or longer?

- ☐ None
- ☐ 1 – 3
- ☐ 4 – 6
- ☐ 7 – 9
- ☐ 10 or more

21. In general, would you say your health is:

- ☐ Excellent
- ☐ Very good
- ☐ Good
- ☐ Fair
- ☐ Poor

The following question is about activities you might do during a typical day.

22. Does your health now limit you in these activities? If so, how much?

a. Moderate activities, such as moving a table, pushing a vacuum cleaner, bowling, or playing golf:

- ☐ Yes, limited a lot
- ☐ Yes, limited a little
- ☐ No, not limited at all

b. Climbing several flights of stairs:

- ☐ Yes, limited a lot
- ☐ Yes, limited a little
- ☐ No, not limited at all

23. During the **PAST 4 WEEKS**, have you had any of the following problems with your work or other regular daily activities as a result of your physical health?

a. Accomplished less than you would like:

- ☐ No, none of the time
- ☐ Yes, a little of the time
- ☐ Yes, some of the time
- ☐ Yes, most of the time
- ☐ Yes, all of the time

b. Were limited in the kind of work or other activities:

- ☐ No, none of the time
- ☐ Yes, a little of the time
- ☐ Yes, some of the time
- ☐ Yes, most of the time
- ☐ Yes, all of the time

24. During the **PAST 4 WEEKS**, have you had any of the following problems with your work or other regular daily activities as a result of any emotional problems (such as feeling depressed or anxious)?

a. Accomplished less than you would like:

- ☐ No, none of the time
- ☐ Yes, a little of the time
- ☐ Yes, some of the time
- ☐ Yes, most of the time
- ☐ Yes, all of the time

b. Did not do work or other activities as carefully as usual:

- ☐ No, none of the time
- ☐ Yes, a little of the time
- ☐ Yes, some of the time
- ☐ Yes, most of the time
- ☐ Yes, all of the time

25. During the **PAST 4 WEEKS**, how much did pain interfere with your normal work (including both work outside the home and housework)?

- ☐ Not at all
- ☐ A little bit
- ☐ Moderately
- ☐ Quite a bit
- ☐ Extremely

Questions 26-27 are about how you feel and how things have been with you. For each question, please give the one answer that comes closest to the way you have been feeling.

26. How much of the time during the **PAST 4 WEEKS:**

a. Have you felt calm and peaceful?

- ☐ All of the time
- ☐ Most of the time
- ☐ A good bit of the time
- ☐ Some of the time
- ☐ A little of the time
- ☐ None of the time

b. Did you have a lot of energy?

- ☐ All of the time
- ☐ Most of the time
- ☐ A good bit of the time
- ☐ Some of the time
- ☐ A little of the time
- ☐ None of the time

c. Have you felt downhearted and blue?

- ☐ All of the time
- ☐ Most of the time
- ☐ A good bit of the time
- ☐ Some of the time
- ☐ A little of the time
- ☐ None of the time

27. During the **PAST 4 WEEKS,** how much of the time has your physical health or emotional problems interfered with your social activities (like visiting with friends, relatives, etc.)

- ☐ All of the time
- ☐ Most of the time
- ☐ Some of the time
- ☐ A little of the time
- ☐ None of the time

Now we'd like to ask you some questions about how your health may have changed.

28. **COMPARED TO ONE YEAR AGO,** how would you rate your:

a. Physical health in general now?

- ☐ Much better
- ☐ Slightly better
- ☐ About the same
- ☐ Slightly worse
- ☐ Much worse

b. Emotional problems (such as feeling anxious, depressed or irritable) now?

- ☐ Much better
- ☐ Slightly better
- ☐ About the same
- ☐ Slightly worse
- ☐ Much worse

c. Cognitive (memory and thinking) health in general now?

- ☐ Much better
- ☐ Slightly better
- ☐ About the same
- ☐ Slightly worse
- ☐ Much worse

29. On a scale of 0 - 10, where 0 means no pain and 10 means pain as bad as you can imagine, please rate your overall amount of pain in the **PAST WEEK:**

|                       |                       |                       |                       |                       |                       |                       |                       |                       |                       |                                |
|-----------------------|-----------------------|-----------------------|-----------------------|-----------------------|-----------------------|-----------------------|-----------------------|-----------------------|-----------------------|--------------------------------|
| 0                     | 1                     | 2                     | 3                     | 4                     | 5                     | 6                     | 7                     | 8                     | 9                     | 10                             |
| <input type="radio"/>          |
| No Pain               |                       |                       |                       |                       |                       |                       |                       |                       |                       | Pain as bad as you can imagine |

## Activities and Habits

30. How would you rate your current physical fitness status?
- ☐ Very good
  - ☐ Fairly good
  - ☐ Satisfactory
  - ☐ Fairly poor
  - ☐ Very poor
31. How physically strenuous is your work/job (paid and unpaid)?
- ☐ Very light (mainly sitting)
  - ☐ Light (mainly walking)
  - ☐ Medium (lifting, carrying light loads)
  - ☐ Heavy manual work (climbing, carrying heavy loads)
  - ☐ Not applicable

## Personal Habits

32. How often do you exercise vigorously enough to work up a sweat?
- ☐ Daily
  - ☐ 5-6 times a week
  - ☐ 2-4 times a week
  - ☐ Once a week
  - ☐ 1-3 times a month
  - ☐ Rarely/Never

33. How often do you have a drink containing alcohol?

- ☒ Never → Skip to Question 36
- ☐ 1-3 days per month
  - ☐ 1 day per week
  - ☐ 2-3 days per week
  - ☐ 4-5 days per week
  - ☐ 6+ days per week

34. How many drinks containing alcohol do you have on a typical day when you are drinking?

- ☐ 1 or 2
- ☐ 3 or 4
- ☐ 5 or 6
- ☐ 7 to 9
- ☐ 10 or more

35. How often do you have six or more drinks on one occasion?

- ☐ Never
- ☐ Less than monthly
- ☐ Monthly
- ☐ 2-3 times per week
- ☐ 4+ times per week



36. In your lifetime, have you smoked a total of at least 100 cigarettes, cigars, or pipes?

☐ No 

☐ Yes 

Skip to Question 37

a. Have you ever smoked daily or almost every day for at least 1 consecutive year?

☐ Yes

☐ No

b. Do you smoke now?

☐ Yes, daily

☐ Yes, occasionally

☐ Not at all

| 37. For each of the following, <u>other than what was prescribed to you</u> , have you ever used...? | No                       | Yes                         | IF YES:<br>When did you use the substance?<br>(Fill in all that apply)<br>Last 12 months      Prior to last 12 months |                       |
|------------------------------------------------------------------------------------------------------|--------------------------|-----------------------------|-----------------------------------------------------------------------------------------------------------------------|-----------------------|
| a. Sedatives                                                                                         | <input type="radio"/> No | <input type="radio"/> Yes → | <input type="radio"/>                                                                                                 | <input type="radio"/> |
| b. Tranquilizers                                                                                     | <input type="radio"/> No | <input type="radio"/> Yes → | <input type="radio"/>                                                                                                 | <input type="radio"/> |
| c. Painkillers (other than over-the-counter medications)                                             | <input type="radio"/> No | <input type="radio"/> Yes → | <input type="radio"/>                                                                                                 | <input type="radio"/> |
| d. Stimulants                                                                                        | <input type="radio"/> No | <input type="radio"/> Yes → | <input type="radio"/>                                                                                                 | <input type="radio"/> |
| e. Marijuana                                                                                         | <input type="radio"/> No | <input type="radio"/> Yes → | <input type="radio"/>                                                                                                 | <input type="radio"/> |
| f. Cocaine or Crack                                                                                  | <input type="radio"/> No | <input type="radio"/> Yes → | <input type="radio"/>                                                                                                 | <input type="radio"/> |
| g. Hallucinogens                                                                                     | <input type="radio"/> No | <input type="radio"/> Yes → | <input type="radio"/>                                                                                                 | <input type="radio"/> |
| h. Inhalants/Solvents                                                                                | <input type="radio"/> No | <input type="radio"/> Yes → | <input type="radio"/>                                                                                                 | <input type="radio"/> |
| i. Heroin                                                                                            | <input type="radio"/> No | <input type="radio"/> Yes → | <input type="radio"/>                                                                                                 | <input type="radio"/> |
| j. Other drug<br><div></div>                                                                         | <input type="radio"/> No | <input type="radio"/> Yes → | <input type="radio"/>                                                                                                 | <input type="radio"/> |
| k. Have you been hospitalized for alcohol or drug dependence in the last 5 years? If yes, when?      | <input type="radio"/> No | <input type="radio"/> Yes → | Most Recent Year Hospitalized <div></div>                                                                             |                       |

| 38. Indicate No or Yes for each.<br>Have you had a persistent or recurring problem with...? |                          |                             | IF YES:<br>How would you rate this problem? |                       |                       | Year of Onset        |
|---------------------------------------------------------------------------------------------|--------------------------|-----------------------------|---------------------------------------------|-----------------------|-----------------------|----------------------|
|                                                                                             | No                       | Yes                         | Mild                                        | Moderate              | Severe                |                      |
| a. Fatigue                                                                                  | <input type="radio"/> No | <input type="radio"/> Yes → | <input type="radio"/>                       | <input type="radio"/> | <input type="radio"/> | <input type="text"/> |
| b. Feeling unwell after physical exercise or exertion                                       | <input type="radio"/> No | <input type="radio"/> Yes → | <input type="radio"/>                       | <input type="radio"/> | <input type="radio"/> | <input type="text"/> |
| c. Problems getting to sleep or staying asleep                                              | <input type="radio"/> No | <input type="radio"/> Yes → | <input type="radio"/>                       | <input type="radio"/> | <input type="radio"/> | <input type="text"/> |
| d. Not feeling rested after you sleep                                                       | <input type="radio"/> No | <input type="radio"/> Yes → | <input type="radio"/>                       | <input type="radio"/> | <input type="radio"/> | <input type="text"/> |
| e. Pain in your joints                                                                      | <input type="radio"/> No | <input type="radio"/> Yes → | <input type="radio"/>                       | <input type="radio"/> | <input type="radio"/> | <input type="text"/> |
| f. Stiffness in your joints                                                                 | <input type="radio"/> No | <input type="radio"/> Yes → | <input type="radio"/>                       | <input type="radio"/> | <input type="radio"/> | <input type="text"/> |
| g. Pain in your muscles                                                                     | <input type="radio"/> No | <input type="radio"/> Yes → | <input type="radio"/>                       | <input type="radio"/> | <input type="radio"/> | <input type="text"/> |
| h. Body pain, where you hurt all over                                                       | <input type="radio"/> No | <input type="radio"/> Yes → | <input type="radio"/>                       | <input type="radio"/> | <input type="radio"/> | <input type="text"/> |
| i. Headaches                                                                                | <input type="radio"/> No | <input type="radio"/> Yes → | <input type="radio"/>                       | <input type="radio"/> | <input type="radio"/> | <input type="text"/> |
| j. Feeling dizzy, lightheaded, or faint                                                     | <input type="radio"/> No | <input type="radio"/> Yes → | <input type="radio"/>                       | <input type="radio"/> | <input type="radio"/> | <input type="text"/> |
| k. Eyes very sensitive to light                                                             | <input type="radio"/> No | <input type="radio"/> Yes → | <input type="radio"/>                       | <input type="radio"/> | <input type="radio"/> | <input type="text"/> |
| l. Blurred or double vision                                                                 | <input type="radio"/> No | <input type="radio"/> Yes → | <input type="radio"/>                       | <input type="radio"/> | <input type="radio"/> | <input type="text"/> |
| m. Numbness or tingling in your extremities                                                 | <input type="radio"/> No | <input type="radio"/> Yes → | <input type="radio"/>                       | <input type="radio"/> | <input type="radio"/> | <input type="text"/> |
| n. Tremors or shaking                                                                       | <input type="radio"/> No | <input type="radio"/> Yes → | <input type="radio"/>                       | <input type="radio"/> | <input type="radio"/> | <input type="text"/> |
| o. Low tolerance for heat or cold                                                           | <input type="radio"/> No | <input type="radio"/> Yes → | <input type="radio"/>                       | <input type="radio"/> | <input type="radio"/> | <input type="text"/> |
| p. Night sweats                                                                             | <input type="radio"/> No | <input type="radio"/> Yes → | <input type="radio"/>                       | <input type="radio"/> | <input type="radio"/> | <input type="text"/> |
| q. Having physical or mental symptoms in response to certain smells or chemicals            | <input type="radio"/> No | <input type="radio"/> Yes → | <input type="radio"/>                       | <input type="radio"/> | <input type="radio"/> | <input type="text"/> |
| r. Skin rashes                                                                              | <input type="radio"/> No | <input type="radio"/> Yes → | <input type="radio"/>                       | <input type="radio"/> | <input type="radio"/> | <input type="text"/> |
| s. Other skin problems<br><input type="text"/>                                              | <input type="radio"/> No | <input type="radio"/> Yes → | <input type="radio"/>                       | <input type="radio"/> | <input type="radio"/> | <input type="text"/> |

| 38. Indicate No or Yes for each.<br>Have you had a persistent or recurring problem with...? |                          |                             | IF YES:<br>How would you rate this problem? |                       |                       | Year of Onset        |
|---------------------------------------------------------------------------------------------|--------------------------|-----------------------------|---------------------------------------------|-----------------------|-----------------------|----------------------|
|                                                                                             | No                       | Yes                         | Mild                                        | Moderate              | Severe                |                      |
| t. Diarrhea                                                                                 | <input type="radio"/> No | <input type="radio"/> Yes → | <input type="radio"/>                       | <input type="radio"/> | <input type="radio"/> | <input type="text"/> |
| u. Nausea or upset stomach                                                                  | <input type="radio"/> No | <input type="radio"/> Yes → | <input type="radio"/>                       | <input type="radio"/> | <input type="radio"/> | <input type="text"/> |
| v. Abdominal pain or cramping                                                               | <input type="radio"/> No | <input type="radio"/> Yes → | <input type="radio"/>                       | <input type="radio"/> | <input type="radio"/> | <input type="text"/> |
| w. Difficulty breathing or shortness of breath                                              | <input type="radio"/> No | <input type="radio"/> Yes → | <input type="radio"/>                       | <input type="radio"/> | <input type="radio"/> | <input type="text"/> |
| x. Frequent coughing when you don't have a cold                                             | <input type="radio"/> No | <input type="radio"/> Yes → | <input type="radio"/>                       | <input type="radio"/> | <input type="radio"/> | <input type="text"/> |
| y. Wheezing in your chest                                                                   | <input type="radio"/> No | <input type="radio"/> Yes → | <input type="radio"/>                       | <input type="radio"/> | <input type="radio"/> | <input type="text"/> |
| z. Sore throat                                                                              | <input type="radio"/> No | <input type="radio"/> Yes → | <input type="radio"/>                       | <input type="radio"/> | <input type="radio"/> | <input type="text"/> |
| aa. Tender or swollen glands (lymph nodes) in your neck or armpits                          | <input type="radio"/> No | <input type="radio"/> Yes → | <input type="radio"/>                       | <input type="radio"/> | <input type="radio"/> | <input type="text"/> |
| bb. Difficulty concentrating                                                                | <input type="radio"/> No | <input type="radio"/> Yes → | <input type="radio"/>                       | <input type="radio"/> | <input type="radio"/> | <input type="text"/> |
| cc. Difficulty remembering recent information                                               | <input type="radio"/> No | <input type="radio"/> Yes → | <input type="radio"/>                       | <input type="radio"/> | <input type="radio"/> | <input type="text"/> |
| dd. Trouble finding words when speaking                                                     | <input type="radio"/> No | <input type="radio"/> Yes → | <input type="radio"/>                       | <input type="radio"/> | <input type="radio"/> | <input type="text"/> |
| ee. Feeling down or depressed                                                               | <input type="radio"/> No | <input type="radio"/> Yes → | <input type="radio"/>                       | <input type="radio"/> | <input type="radio"/> | <input type="text"/> |
| ff. Feeling irritable or having angry outbursts                                             | <input type="radio"/> No | <input type="radio"/> Yes → | <input type="radio"/>                       | <input type="radio"/> | <input type="radio"/> | <input type="text"/> |
| gg. Feeling moody                                                                           | <input type="radio"/> No | <input type="radio"/> Yes → | <input type="radio"/>                       | <input type="radio"/> | <input type="radio"/> | <input type="text"/> |
| hh. Feeling anxious                                                                         | <input type="radio"/> No | <input type="radio"/> Yes → | <input type="radio"/>                       | <input type="radio"/> | <input type="radio"/> | <input type="text"/> |

**39. Please tell us if a doctor or other healthcare provider has ever told you that you have any of the following conditions. Fill in No or Yes for each. If Yes, write the year you were told, and whether you currently take any medication(s) ("Currently Taking Meds") for that condition.**

**Have you ever been told that you have... ?**

| 39a. Circulatory System Problems                             | No      Yes                                          | IF YES:                                                                             |                                                    |
|--------------------------------------------------------------|------------------------------------------------------|-------------------------------------------------------------------------------------|----------------------------------------------------|
|                                                              |                                                      | Year Told                                                                           | Currently Taking Meds                              |
| 1. High blood pressure (Hypertension)                        | <input type="radio"/> No <input type="radio"/> Yes → | <input type="text"/> <input type="text"/> <input type="text"/> <input type="text"/> | <input type="radio"/> No <input type="radio"/> Yes |
| 2. Stroke                                                    | <input type="radio"/> No <input type="radio"/> Yes → | <input type="text"/> <input type="text"/> <input type="text"/> <input type="text"/> | <input type="radio"/> No <input type="radio"/> Yes |
| 3. Transient ischemic attack (TIA)                           | <input type="radio"/> No <input type="radio"/> Yes → | <input type="text"/> <input type="text"/> <input type="text"/> <input type="text"/> | <input type="radio"/> No <input type="radio"/> Yes |
| 4. Heart attack                                              | <input type="radio"/> No <input type="radio"/> Yes → | <input type="text"/> <input type="text"/> <input type="text"/> <input type="text"/> | <input type="radio"/> No <input type="radio"/> Yes |
| 5. Coronary artery/Coronary heart disease (includes angina)  | <input type="radio"/> No <input type="radio"/> Yes → | <input type="text"/> <input type="text"/> <input type="text"/> <input type="text"/> | <input type="radio"/> No <input type="radio"/> Yes |
| 6. Peripheral vascular disease                               | <input type="radio"/> No <input type="radio"/> Yes → | <input type="text"/> <input type="text"/> <input type="text"/> <input type="text"/> | <input type="radio"/> No <input type="radio"/> Yes |
| 7. High cholesterol                                          | <input type="radio"/> No <input type="radio"/> Yes → | <input type="text"/> <input type="text"/> <input type="text"/> <input type="text"/> | <input type="radio"/> No <input type="radio"/> Yes |
| 8. Pulmonary embolism or deep vein thrombosis (DVT)          | <input type="radio"/> No <input type="radio"/> Yes → | <input type="text"/> <input type="text"/> <input type="text"/> <input type="text"/> | <input type="radio"/> No <input type="radio"/> Yes |
| 9. Congestive heart failure                                  | <input type="radio"/> No <input type="radio"/> Yes → | <input type="text"/> <input type="text"/> <input type="text"/> <input type="text"/> | <input type="radio"/> No <input type="radio"/> Yes |
| 10. Other circulatory system problem<br><input type="text"/> | <input type="radio"/> No <input type="radio"/> Yes → | <input type="text"/> <input type="text"/> <input type="text"/> <input type="text"/> | <input type="radio"/> No <input type="radio"/> Yes |

Have you ever been told that you have... ?

| 39b. Skeletal/Muscular Problems                                                                            |                          |                             | IF YES:<br>Year Told                                                                | Currently<br>Taking Meds                                                            |
|------------------------------------------------------------------------------------------------------------|--------------------------|-----------------------------|-------------------------------------------------------------------------------------|-------------------------------------------------------------------------------------|
|                                                                                                            | No                       | Yes                         |                                                                                     |                                                                                     |
| 1. Osteoarthritis                                                                                          | <input type="radio"/> No | <input type="radio"/> Yes → | <input type="text"/> <input type="text"/> <input type="text"/> <input type="text"/> | <input type="radio"/> No <input type="radio"/> Yes                                  |
| 2. Rheumatoid arthritis                                                                                    | <input type="radio"/> No | <input type="radio"/> Yes → | <input type="text"/> <input type="text"/> <input type="text"/> <input type="text"/> | <input type="radio"/> No <input type="radio"/> Yes                                  |
| 3. Other arthritis<br><input type="text"/>                                                                 | <input type="radio"/> No | <input type="radio"/> Yes → | <input type="text"/> <input type="text"/> <input type="text"/> <input type="text"/> | <input type="radio"/> No <input type="radio"/> Yes                                  |
| 4. Gout                                                                                                    | <input type="radio"/> No | <input type="radio"/> Yes → | <input type="text"/> <input type="text"/> <input type="text"/> <input type="text"/> | <input type="radio"/> No <input type="radio"/> Yes                                  |
| 5. Osteoporosis                                                                                            | <input type="radio"/> No | <input type="radio"/> Yes → | <input type="text"/> <input type="text"/> <input type="text"/> <input type="text"/> | <input type="radio"/> No <input type="radio"/> Yes                                  |
| 6. Other skeletal/muscular problem<br><input type="text"/>                                                 | <input type="radio"/> No | <input type="radio"/> Yes → | <input type="text"/> <input type="text"/> <input type="text"/> <input type="text"/> | <input type="radio"/> No <input type="radio"/> Yes                                  |
| <b>39c. Mental Health Disorders</b>                                                                        |                          |                             |                                                                                     |                                                                                     |
| 1. Anxiety reaction/Panic disorder                                                                         | <input type="radio"/> No | <input type="radio"/> Yes → | <input type="text"/> <input type="text"/> <input type="text"/> <input type="text"/> | <input type="radio"/> No <input type="radio"/> Yes                                  |
| 2. Attention deficit hyperactivity disorder (ADHD)                                                         | <input type="radio"/> No | <input type="radio"/> Yes → | <input type="text"/> <input type="text"/> <input type="text"/> <input type="text"/> | <input type="radio"/> No <input type="radio"/> Yes                                  |
| 3. Bipolar disorder                                                                                        | <input type="radio"/> No | <input type="radio"/> Yes → | <input type="text"/> <input type="text"/> <input type="text"/> <input type="text"/> | <input type="radio"/> No <input type="radio"/> Yes                                  |
| 4. Posttraumatic stress disorder (PTSD)                                                                    | <input type="radio"/> No | <input type="radio"/> Yes → | <input type="text"/> <input type="text"/> <input type="text"/> <input type="text"/> | <input type="radio"/> No <input type="radio"/> Yes                                  |
| 5. Depression                                                                                              | <input type="radio"/> No | <input type="radio"/> Yes → | <input type="text"/> <input type="text"/> <input type="text"/> <input type="text"/> | <input type="radio"/> No <input type="radio"/> Yes                                  |
| 6. Eating disorder                                                                                         | <input type="radio"/> No | <input type="radio"/> Yes → | <input type="text"/> <input type="text"/> <input type="text"/> <input type="text"/> | <input type="radio"/> No <input type="radio"/> Yes                                  |
| 7. Personality disorder                                                                                    | <input type="radio"/> No | <input type="radio"/> Yes → | <input type="text"/> <input type="text"/> <input type="text"/> <input type="text"/> | <input type="radio"/> No <input type="radio"/> Yes                                  |
| 8. Schizophrenia                                                                                           | <input type="radio"/> No | <input type="radio"/> Yes → | <input type="text"/> <input type="text"/> <input type="text"/> <input type="text"/> | <input type="radio"/> No <input type="radio"/> Yes                                  |
| 9. Social phobia                                                                                           | <input type="radio"/> No | <input type="radio"/> Yes → | <input type="text"/> <input type="text"/> <input type="text"/> <input type="text"/> | <input type="radio"/> No <input type="radio"/> Yes                                  |
| 10. Other mental health disorder<br><input type="text"/>                                                   | <input type="radio"/> No | <input type="radio"/> Yes → | <input type="text"/> <input type="text"/> <input type="text"/> <input type="text"/> | <input type="radio"/> No <input type="radio"/> Yes                                  |
| 11. Have you been hospitalized for posttraumatic stress disorder (PTSD) in the last 5 years? If yes, when? | <input type="radio"/> No | <input type="radio"/> Yes → | Most Recent<br>Year Hospitalized                                                    | <input type="text"/> <input type="text"/> <input type="text"/> <input type="text"/> |
| 12. Have you been hospitalized for depression in the last 5 years? If yes, when?                           | <input type="radio"/> No | <input type="radio"/> Yes → | Most Recent<br>Year Hospitalized                                                    | <input type="text"/> <input type="text"/> <input type="text"/> <input type="text"/> |
| 13. Have you been hospitalized for any other mental health disorder? If yes, when?                         | <input type="radio"/> No | <input type="radio"/> Yes → | Most Recent<br>Year Hospitalized                                                    | <input type="text"/> <input type="text"/> <input type="text"/> <input type="text"/> |

Have you ever been told that you have... ?

| 39d. Vision/Hearing Problems                                        | No                       | Yes                         |  | IF YES:<br>Year Told | Currently<br>Taking Meds                           |
|---------------------------------------------------------------------|--------------------------|-----------------------------|--|----------------------|----------------------------------------------------|
| 1. Cataracts                                                        | <input type="radio"/> No | <input type="radio"/> Yes → |  |                      | <input type="radio"/> No <input type="radio"/> Yes |
| 2. Glaucoma                                                         | <input type="radio"/> No | <input type="radio"/> Yes → |  |                      | <input type="radio"/> No <input type="radio"/> Yes |
| 3. Macular degeneration                                             | <input type="radio"/> No | <input type="radio"/> Yes → |  |                      | <input type="radio"/> No <input type="radio"/> Yes |
| 4. Blindness, all causes                                            | <input type="radio"/> No | <input type="radio"/> Yes → |  |                      | <input type="radio"/> No <input type="radio"/> Yes |
| 5. Tinnitus, or ringing in the ears                                 | <input type="radio"/> No | <input type="radio"/> Yes → |  |                      | <input type="radio"/> No <input type="radio"/> Yes |
| 6. Severe hearing loss or partial deafness<br>in one or both ears   | <input type="radio"/> No | <input type="radio"/> Yes → |  |                      | <input type="radio"/> No <input type="radio"/> Yes |
| <b>39e. Infectious Diseases</b>                                     |                          |                             |  |                      |                                                    |
| 1. Tuberculosis                                                     | <input type="radio"/> No | <input type="radio"/> Yes → |  |                      | <input type="radio"/> No <input type="radio"/> Yes |
| 2. Hepatitis C                                                      | <input type="radio"/> No | <input type="radio"/> Yes → |  |                      | <input type="radio"/> No <input type="radio"/> Yes |
| 3. HIV/AIDS                                                         | <input type="radio"/> No | <input type="radio"/> Yes → |  |                      | <input type="radio"/> No <input type="radio"/> Yes |
| 4. Other infectious disease<br>If yes, specify type:<br><div></div> | <input type="radio"/> No | <input type="radio"/> Yes → |  |                      | <input type="radio"/> No <input type="radio"/> Yes |
| <b>39f. Kidney Diseases</b>                                         |                          |                             |  |                      |                                                    |
| 1. Kidney disease without dialysis                                  | <input type="radio"/> No | <input type="radio"/> Yes → |  |                      | <input type="radio"/> No <input type="radio"/> Yes |
| 2. Kidney disease with dialysis                                     | <input type="radio"/> No | <input type="radio"/> Yes → |  |                      | <input type="radio"/> No <input type="radio"/> Yes |
| 3. Acute kidney disease<br>with no current dialysis                 | <input type="radio"/> No | <input type="radio"/> Yes → |  |                      | <input type="radio"/> No <input type="radio"/> Yes |

**Have you ever been told that you have... ?**

| 39g. Digestive System Problems                             | No                       | Yes                         | Year Told            | IF YES:<br>Currently Taking Meds                   |
|------------------------------------------------------------|--------------------------|-----------------------------|----------------------|----------------------------------------------------|
|                                                            |                          |                             |                      |                                                    |
| 1. Acid reflux/GERD                                        | <input type="radio"/> No | <input type="radio"/> Yes → | <input type="text"/> | <input type="radio"/> No <input type="radio"/> Yes |
| 2. Peptic ulcers                                           | <input type="radio"/> No | <input type="radio"/> Yes → | <input type="text"/> | <input type="radio"/> No <input type="radio"/> Yes |
| 3. Bowel obstruction                                       | <input type="radio"/> No | <input type="radio"/> Yes → | <input type="text"/> | <input type="radio"/> No <input type="radio"/> Yes |
| 4. Colon polyps                                            | <input type="radio"/> No | <input type="radio"/> Yes → | <input type="text"/> | <input type="radio"/> No <input type="radio"/> Yes |
| 5. Irritable bowel syndrome (IBS)                          | <input type="radio"/> No | <input type="radio"/> Yes → | <input type="text"/> | <input type="radio"/> No <input type="radio"/> Yes |
| 6. Ulcerative colitis                                      | <input type="radio"/> No | <input type="radio"/> Yes → | <input type="text"/> | <input type="radio"/> No <input type="radio"/> Yes |
| 7. Crohn's disease                                         | <input type="radio"/> No | <input type="radio"/> Yes → | <input type="text"/> | <input type="radio"/> No <input type="radio"/> Yes |
| 8. Celiac disease/Sprue                                    | <input type="radio"/> No | <input type="radio"/> Yes → | <input type="text"/> | <input type="radio"/> No <input type="radio"/> Yes |
| 9. Other digestive system disorder<br><input type="text"/> | <input type="radio"/> No | <input type="radio"/> Yes → | <input type="text"/> | <input type="radio"/> No <input type="radio"/> Yes |
| <b>39h. Cancer</b>                                         |                          |                             |                      |                                                    |
| 1. Brain cancer                                            | <input type="radio"/> No | <input type="radio"/> Yes → | <input type="text"/> | <input type="radio"/> No <input type="radio"/> Yes |
| 2. Breast cancer                                           | <input type="radio"/> No | <input type="radio"/> Yes → | <input type="text"/> | <input type="radio"/> No <input type="radio"/> Yes |
| 3. Colon cancer/Rectal cancer                              | <input type="radio"/> No | <input type="radio"/> Yes → | <input type="text"/> | <input type="radio"/> No <input type="radio"/> Yes |
| 4. Lung cancer                                             | <input type="radio"/> No | <input type="radio"/> Yes → | <input type="text"/> | <input type="radio"/> No <input type="radio"/> Yes |
| 5. Prostate cancer                                         | <input type="radio"/> No | <input type="radio"/> Yes → | <input type="text"/> | <input type="radio"/> No <input type="radio"/> Yes |
| 6. Melanoma                                                | <input type="radio"/> No | <input type="radio"/> Yes → | <input type="text"/> | <input type="radio"/> No <input type="radio"/> Yes |
| 7. Skin cancer, other than melanoma                        | <input type="radio"/> No | <input type="radio"/> Yes → | <input type="text"/> | <input type="radio"/> No <input type="radio"/> Yes |
| 8. Other cancer<br><input type="text"/>                    | <input type="radio"/> No | <input type="radio"/> Yes → | <input type="text"/> | <input type="radio"/> No <input type="radio"/> Yes |

**Have you ever been told that you have... ?**

| 39i. Nervous System Problems                                      | No                    | Yes | Year Told             | IF YES:<br>Currently<br>Taking Meds |                                                              |                       |    |                       |     |
|-------------------------------------------------------------------|-----------------------|-----|-----------------------|-------------------------------------|--------------------------------------------------------------|-----------------------|----|-----------------------|-----|
| 1. Migraine headaches                                             | <input type="radio"/> | No  | <input type="radio"/> | Yes →                               | <div> <div></div> <div></div> <div></div> <div></div> </div> | <input type="radio"/> | No | <input type="radio"/> | Yes |
| 2. Other headaches                                                | <input type="radio"/> | No  | <input type="radio"/> | Yes →                               | <div> <div></div> <div></div> <div></div> <div></div> </div> | <input type="radio"/> | No | <input type="radio"/> | Yes |
| 3. Memory loss or impairment                                      | <input type="radio"/> | No  | <input type="radio"/> | Yes →                               | <div> <div></div> <div></div> <div></div> <div></div> </div> | <input type="radio"/> | No | <input type="radio"/> | Yes |
| 4. Dementia (includes Alzheimer's, vascular, etc.)                | <input type="radio"/> | No  | <input type="radio"/> | Yes →                               | <div> <div></div> <div></div> <div></div> <div></div> </div> | <input type="radio"/> | No | <input type="radio"/> | Yes |
| 5. Concussion or loss of consciousness                            | <input type="radio"/> | No  | <input type="radio"/> | Yes →                               | <div> <div></div> <div></div> <div></div> <div></div> </div> | <input type="radio"/> | No | <input type="radio"/> | Yes |
| 6. Traumatic brain injury (TBI)                                   | <input type="radio"/> | No  | <input type="radio"/> | Yes →                               | <div> <div></div> <div></div> <div></div> <div></div> </div> | <input type="radio"/> | No | <input type="radio"/> | Yes |
| 7. Spinal cord injury or impairment                               | <input type="radio"/> | No  | <input type="radio"/> | Yes →                               | <div> <div></div> <div></div> <div></div> <div></div> </div> | <input type="radio"/> | No | <input type="radio"/> | Yes |
| 8. Epilepsy/Seizure                                               | <input type="radio"/> | No  | <input type="radio"/> | Yes →                               | <div> <div></div> <div></div> <div></div> <div></div> </div> | <input type="radio"/> | No | <input type="radio"/> | Yes |
| 9. Parkinson's disease                                            | <input type="radio"/> | No  | <input type="radio"/> | Yes →                               | <div> <div></div> <div></div> <div></div> <div></div> </div> | <input type="radio"/> | No | <input type="radio"/> | Yes |
| 10. Amyotrophic lateral sclerosis (ALS)<br>(Lou Gehrig's disease) | <input type="radio"/> | No  | <input type="radio"/> | Yes →                               | <div> <div></div> <div></div> <div></div> <div></div> </div> | <input type="radio"/> | No | <input type="radio"/> | Yes |
| 11. Multiple sclerosis (MS)                                       | <input type="radio"/> | No  | <input type="radio"/> | Yes →                               | <div> <div></div> <div></div> <div></div> <div></div> </div> | <input type="radio"/> | No | <input type="radio"/> | Yes |
| 12. Other nervous system problem<br><div></div>                   | <input type="radio"/> | No  | <input type="radio"/> | Yes →                               | <div> <div></div> <div></div> <div></div> <div></div> </div> | <input type="radio"/> | No | <input type="radio"/> | Yes |



Have you ever been told that you have... ?

| 39j. Other Conditions                                   | No      Yes                                          | IF YES:<br>Year Told                                                                | Currently<br>Taking Meds                           |
|---------------------------------------------------------|------------------------------------------------------|-------------------------------------------------------------------------------------|----------------------------------------------------|
| 1. Asthma                                               | <input type="radio"/> No <input type="radio"/> Yes → | <input type="text"/> <input type="text"/> <input type="text"/> <input type="text"/> | <input type="radio"/> No <input type="radio"/> Yes |
| 2. Chronic lung disease (COPD, Emphysema or Bronchitis) | <input type="radio"/> No <input type="radio"/> Yes → | <input type="text"/> <input type="text"/> <input type="text"/> <input type="text"/> | <input type="radio"/> No <input type="radio"/> Yes |
| 3. Diabetes/"Sugar"                                     | <input type="radio"/> No <input type="radio"/> Yes → | <input type="text"/> <input type="text"/> <input type="text"/> <input type="text"/> | <input type="radio"/> No <input type="radio"/> Yes |
| 4. Enlarged prostate (Benign prostatic hyperplasia)     | <input type="radio"/> No <input type="radio"/> Yes → | <input type="text"/> <input type="text"/> <input type="text"/> <input type="text"/> | <input type="radio"/> No <input type="radio"/> Yes |
| 5. Liver condition (e.g., Cirrhosis)                    | <input type="radio"/> No <input type="radio"/> Yes → | <input type="text"/> <input type="text"/> <input type="text"/> <input type="text"/> | <input type="radio"/> No <input type="radio"/> Yes |
| 6. Sleep apnea                                          | <input type="radio"/> No <input type="radio"/> Yes → | <input type="text"/> <input type="text"/> <input type="text"/> <input type="text"/> | <input type="radio"/> No <input type="radio"/> Yes |
| 7. Lupus                                                | <input type="radio"/> No <input type="radio"/> Yes → | <input type="text"/> <input type="text"/> <input type="text"/> <input type="text"/> | <input type="radio"/> No <input type="radio"/> Yes |
| 8. Thyroid problems<br><input type="text"/>             | <input type="radio"/> No <input type="radio"/> Yes → | <input type="text"/> <input type="text"/> <input type="text"/> <input type="text"/> | <input type="radio"/> No <input type="radio"/> Yes |
| 9. Chronic Fatigue Syndrome                             | <input type="radio"/> No <input type="radio"/> Yes → | <input type="text"/> <input type="text"/> <input type="text"/> <input type="text"/> | <input type="radio"/> No <input type="radio"/> Yes |
| 10. Fibromyalgia                                        | <input type="radio"/> No <input type="radio"/> Yes → | <input type="text"/> <input type="text"/> <input type="text"/> <input type="text"/> | <input type="radio"/> No <input type="radio"/> Yes |
| 11. Other disease/disorder<br>a. <input type="text"/>   | <input type="radio"/> Yes →                          | <input type="text"/> <input type="text"/> <input type="text"/> <input type="text"/> | <input type="radio"/> No <input type="radio"/> Yes |
| b. <input type="text"/>                                 | <input type="radio"/> Yes →                          | <input type="text"/> <input type="text"/> <input type="text"/> <input type="text"/> | <input type="radio"/> No <input type="radio"/> Yes |
| c. <input type="text"/>                                 | <input type="radio"/> Yes →                          | <input type="text"/> <input type="text"/> <input type="text"/> <input type="text"/> | <input type="radio"/> No <input type="radio"/> Yes |

| 39k. Gulf War Illness                                      | No                       | Yes                         | IF YES:<br>How would you rate this problem? |                       |                       |                                                                                                                                                                                                                                                                                                                                                                                             | Year of Onset |
|------------------------------------------------------------|--------------------------|-----------------------------|---------------------------------------------|-----------------------|-----------------------|---------------------------------------------------------------------------------------------------------------------------------------------------------------------------------------------------------------------------------------------------------------------------------------------------------------------------------------------------------------------------------------------|---------------|
|                                                            |                          |                             | Mild                                        | Moderate              | Severe                |                                                                                                                                                                                                                                                                                                                                                                                             |               |
| 1. Have you ever been told that you have Gulf War Illness? | <input type="radio"/> No | <input type="radio"/> Yes → | <input type="radio"/>                       | <input type="radio"/> | <input type="radio"/> | <div style="border: 1px solid black; display: inline-block; width: 20px; height: 20px;"></div> <div style="border: 1px solid black; display: inline-block; width: 20px; height: 20px;"></div> <div style="border: 1px solid black; display: inline-block; width: 20px; height: 20px;"></div> <div style="border: 1px solid black; display: inline-block; width: 20px; height: 20px;"></div> |               |
| 2. Do you feel that you have Gulf War Illness?             | <input type="radio"/> No | <input type="radio"/> Yes → | <input type="radio"/>                       | <input type="radio"/> | <input type="radio"/> | <div style="border: 1px solid black; display: inline-block; width: 20px; height: 20px;"></div> <div style="border: 1px solid black; display: inline-block; width: 20px; height: 20px;"></div> <div style="border: 1px solid black; display: inline-block; width: 20px; height: 20px;"></div> <div style="border: 1px solid black; display: inline-block; width: 20px; height: 20px;"></div> |               |

| 40. Over the <b>LAST 2 WEEKS</b> , how often have you been bothered by any of the following problems?                                                                                                                                                                                                                                                                                                                                                            | Not at all            | Several days          | More than half the days | Nearly every day      |
|------------------------------------------------------------------------------------------------------------------------------------------------------------------------------------------------------------------------------------------------------------------------------------------------------------------------------------------------------------------------------------------------------------------------------------------------------------------|-----------------------|-----------------------|-------------------------|-----------------------|
| a. Little interest or pleasure in doing things                                                                                                                                                                                                                                                                                                                                                                                                                   | <input type="radio"/> | <input type="radio"/> | <input type="radio"/>   | <input type="radio"/> |
| b. Feeling down, depressed, or hopeless                                                                                                                                                                                                                                                                                                                                                                                                                          | <input type="radio"/> | <input type="radio"/> | <input type="radio"/>   | <input type="radio"/> |
| c. Trouble falling or staying asleep, or sleeping too much                                                                                                                                                                                                                                                                                                                                                                                                       | <input type="radio"/> | <input type="radio"/> | <input type="radio"/>   | <input type="radio"/> |
| d. Feeling tired or having little energy                                                                                                                                                                                                                                                                                                                                                                                                                         | <input type="radio"/> | <input type="radio"/> | <input type="radio"/>   | <input type="radio"/> |
| e. Poor appetite or overeating                                                                                                                                                                                                                                                                                                                                                                                                                                   | <input type="radio"/> | <input type="radio"/> | <input type="radio"/>   | <input type="radio"/> |
| f. Feeling bad about yourself - or that you are a failure or have let yourself or your family down                                                                                                                                                                                                                                                                                                                                                               | <input type="radio"/> | <input type="radio"/> | <input type="radio"/>   | <input type="radio"/> |
| g. Trouble concentrating on things, such as reading the newspaper or watching television                                                                                                                                                                                                                                                                                                                                                                         | <input type="radio"/> | <input type="radio"/> | <input type="radio"/>   | <input type="radio"/> |
| h. Moving or speaking so slowly that other people could have noticed? Or the opposite - being so fidgety or restless that you have been moving around a lot more than usual                                                                                                                                                                                                                                                                                      | <input type="radio"/> | <input type="radio"/> | <input type="radio"/>   | <input type="radio"/> |
| i. If you filled in <i>Several days</i> , <i>More than half the days</i> , or <i>Nearly every day</i> for any problems in the table above, how <u>difficult</u> have these problems made it for you to do your work, take care of things at home, or get along with other people?<br><input type="radio"/> Not difficult at all<br><input type="radio"/> Somewhat difficult<br><input type="radio"/> Very difficult<br><input type="radio"/> Extremely difficult |                       |                       |                         |                       |

| 41. Below is a list of problems and complaints that Veterans sometimes have in response to stressful life experiences. Please read each one carefully and fill in one bubble per row to indicate how much you have been bothered by that problem IN THE LAST MONTH. | Not at all            | A little bit          | Moderately            | Quite a bit           | Extremely             |
|---------------------------------------------------------------------------------------------------------------------------------------------------------------------------------------------------------------------------------------------------------------------|-----------------------|-----------------------|-----------------------|-----------------------|-----------------------|
| a. Repeated, disturbing <i>memories, thoughts, or images</i> of a stressful experience from the past?                                                                                                                                                               | <input type="radio"/> |
| b. Repeated, disturbing <i>dreams</i> of a stressful experience from the past?                                                                                                                                                                                      | <input type="radio"/> |
| c. Suddenly <i>acting or feeling</i> as if a stressful experience <i>were happening</i> again (as if you were reliving it)?                                                                                                                                         | <input type="radio"/> |
| d. Feeling <i>very upset</i> when <i>something reminded</i> you of a stressful experience from the past?                                                                                                                                                            | <input type="radio"/> |
| e. Having <i>physical reactions</i> (e.g., heart pounding, trouble breathing, or sweating) when <i>something reminded</i> you of a stressful experience from the past?                                                                                              | <input type="radio"/> |
| f. Avoid <i>thinking about</i> or <i>talking about</i> a stressful experience from the past or avoid <i>having feelings</i> related to it?                                                                                                                          | <input type="radio"/> |
| g. Avoid <i>activities or situations</i> because they <i>remind you</i> of a stressful experience from the past?                                                                                                                                                    | <input type="radio"/> |
| h. Trouble <i>remembering important parts</i> of a stressful experience from the past?                                                                                                                                                                              | <input type="radio"/> |
| i. Loss of <i>interest in things that you used to enjoy</i> ?                                                                                                                                                                                                       | <input type="radio"/> |
| j. Feeling <i>distant</i> or <i>cut off</i> from other people?                                                                                                                                                                                                      | <input type="radio"/> |
| k. Feeling <i>emotionally numb</i> or being unable to have loving feelings for those close to you?                                                                                                                                                                  | <input type="radio"/> |
| l. Feeling as if your <i>future</i> will somehow be <i>cut short</i> ?                                                                                                                                                                                              | <input type="radio"/> |
| m. Trouble <i>falling or staying asleep</i> ?                                                                                                                                                                                                                       | <input type="radio"/> |
| n. Feeling <i>irritable</i> or having <i>angry outbursts</i> ?                                                                                                                                                                                                      | <input type="radio"/> |
| o. Having <i>difficulty concentrating</i> ?                                                                                                                                                                                                                         | <input type="radio"/> |
| p. Being " <i>super alert</i> " or watchful on guard?                                                                                                                                                                                                               | <input type="radio"/> |
| q. Feeling <i>jumpy</i> or easily startled?                                                                                                                                                                                                                         | <input type="radio"/> |

Thank you for your time and participation in this study.

Thank you for your service!

Please return the completed questionnaire in the enclosed envelope to:

Department of Veterans Affairs

1990-1991 Gulf War Era Survey

PO Box 6378

Chicago, IL 60680-9919
