# Supplementary material for: The Million Veteran Program 1990–1991 Gulf War Era Survey: An Evaluation of Veteran Response, Characteristics, and Representativeness of the Gulf War Era Veteran Population
Source: MDPI journal article supplement (doi:10.3390/ijerph21010072), 2024-01-08
Supplement: s1 [file s1]

**Supplementary File S2.** Gulf War Era Veteran Response Rates Stratified by Deployment Status and Rank.

| Category                             | Deployed                       |                                  | Not Deployed                    |                                  |
|--------------------------------------|--------------------------------|----------------------------------|---------------------------------|----------------------------------|
|                                      | Officer<br>( <i>n</i> = 2,180) | Enlisted<br>( <i>n</i> = 21,108) | Officer<br>( <i>n</i> = 12,731) | Enlisted<br>( <i>n</i> = 69,880) |
| Overall Response ( <i>n</i> , %)     | 1,466<br>(67.3)                | 8,798<br>(41.7)                  | 7,829<br>(61.5)                 | 25,206<br>(36.1)                 |
| Gender <sup>1</sup> (%)              |                                |                                  |                                 |                                  |
| Male                                 | 68.5                           | 41.9                             | 62.0                            | 35.9                             |
| Female                               | 61.6                           | 39.6                             | 59.0                            | 36.8                             |
| Age Group <sup>1</sup> (%)           |                                |                                  |                                 |                                  |
| 40-49                                | 48.5                           | 29.7                             | 41.3                            | 23.2                             |
| 50-59                                | 58.3                           | 38.4                             | 51.7                            | 29.5                             |
| 60-69                                | 71.0                           | 53.5                             | 62.2                            | 44.3                             |
| 70+                                  | 79.6                           | 65.8                             | 68.5                            | 52.0                             |
| Race <sup>1</sup> (%)                |                                |                                  |                                 |                                  |
| White                                | 71.4                           | 46.4                             | 64.6                            | 40.6                             |
| Black/African American               | 39.5                           | 32.5                             | 39.8                            | 25.3                             |
| Asian                                | 92.3                           | 40.0                             | 54.2                            | 37.6                             |
| American Indian/Alaskan Native       | 58.5                           | 39.8                             | 50.3                            | 34.1                             |
| Other                                | 73.1                           | 50.2                             | 54.7                            | 41.1                             |
| Multiple Responses                   | 65.6                           | 53.1                             | 61.9                            | 45.3                             |
| Missing                              | 25.0                           | 19.3                             | 27.3                            | 16.7                             |
| Ethnicity <sup>1</sup> (%)           |                                |                                  |                                 |                                  |
| Hispanic or Latino                   | 60.9                           | 43.2                             | 54.8                            | 34.5                             |
| Not Hispanic or Latino               | 67.7                           | 41.7                             | 61.9                            | 36.3                             |
| Unknown                              | --                             | 12.8                             | 35.0                            | 14.6                             |
| Education <sup>2</sup> (%)           |                                |                                  |                                 |                                  |
| High school or less                  | 100.0                          | 56.9                             | 58.3                            | 47.2                             |
| Some college                         | 82.1                           | 57.7                             | 62.0                            | 50.2                             |
| Associates                           | 76.5                           | 60.3                             | 58.0                            | 53.8                             |
| Bachelors                            | 74.5                           | 63.0                             | 65.9                            | 55.6                             |
| Masters/Professional/Doctorate       | 77.2                           | 63.0                             | 72.2                            | 59.1                             |
| Missing                              | 72.7                           | 47.5                             | 55.2                            | 45.7                             |
| Income (annual) <sup>2</sup> (%)     |                                |                                  |                                 |                                  |
| <\$30,000                            | 61.3                           | 52.0                             | 54.6                            | 43.1                             |
| \$30,000-\$59,999                    | 77.4                           | 59.4                             | 63.0                            | 52.7                             |
| \$60,000-\$99,999                    | 75.8                           | 63.0                             | 70.3                            | 57.1                             |
| \$100,000+                           | 77.7                           | 62.1                             | 72.8                            | 58.7                             |
| Missing                              | 77.5                           | 60.6                             | 72.4                            | 53.2                             |
| Marital Status <sup>3</sup> (%)      |                                |                                  |                                 |                                  |
| Married or cohabitating with partner | 77.2                           | 60.3                             | 70.6                            | 53.6                             |
| Missing                              | 29.7                           | 17.3                             | 24.0                            | 12.4                             |
| Service Branch <sup>4</sup> (%)      |                                |                                  |                                 |                                  |
| Army                                 | 66.6                           | 41.3                             | 59.4                            | 34.4                             |
| Navy                                 | 68.8                           | 39.8                             | 64.4                            | 35.1                             |

|                                                         |      |      |      |      |
|---------------------------------------------------------|------|------|------|------|
| Air force                                               | 68.1 | 49.2 | 63.5 | 42.7 |
| Marine Corps                                            | 66.2 | 40.7 | 60.7 | 31.1 |
| Coast Guard                                             | 75.0 | 71.4 | 67.5 | 39.1 |
| Other <sup>4</sup>                                      | 29.7 | 17.3 | 24.0 | 12.4 |
| <hr/>                                                   |      |      |      |      |
| Component <sup>4</sup> (%)                              |      |      |      |      |
| Active Duty                                             | 66.5 | 40.3 | 64.4 | 35.8 |
| National Guard                                          | 72.6 | 50.3 | 58.7 | 39.7 |
| Reserves                                                | 68.0 | 46.5 | 57.9 | 34.5 |
| <hr/>                                                   |      |      |      |      |
| Current health status <sup>2</sup> (%)                  |      |      |      |      |
| Good to excellent                                       | 78.5 | 61.9 | 72.3 | 55.9 |
| Fair to poor                                            | 70.7 | 56.5 | 61.6 | 47.1 |
| Missing                                                 | 60.0 | 42.0 | 48.0 | 40.4 |
| <hr/>                                                   |      |      |      |      |
| Current physical fitness status <sup>2</sup> (%)        |      |      |      |      |
| Very good to fairly good                                | 80.1 | 63.7 | 74.2 | 56.3 |
| Satisfactory                                            | 73.9 | 59.7 | 67.5 | 53.1 |
| Fairly poor to very poor                                | 71.5 | 55.8 | 61.2 | 47.6 |
| Missing                                                 | 26.1 | 16.4 | 21.2 | 11.6 |
| <hr/>                                                   |      |      |      |      |
| Current exercise frequency <sup>2</sup> (%)             |      |      |      |      |
| ≤1–3 times/month                                        | 74.4 | 56.6 | 66.3 | 50.5 |
| Once/week                                               | 73.4 | 61.9 | 66.9 | 53.3 |
| 2–4 times/week                                          | 76.9 | 62.2 | 71.9 | 54.4 |
| ≥ 5 times/week                                          | 82.5 | 59.9 | 74.8 | 54.5 |
| Missing                                                 | 57.1 | 53.9 | 56.9 | 39.0 |
| <hr/>                                                   |      |      |      |      |
| Pain intensity, past week <sup>2</sup> (%)              |      |      |      |      |
| No pain (0)                                             | 80.0 | 61.4 | 73.2 | 56.0 |
| Mild pain (1–3)                                         | 79.0 | 61.1 | 73.8 | 57.1 |
| Moderate pain (4–6)                                     | 78.1 | 60.1 | 66.5 | 51.9 |
| Severe pain (7–10)                                      | 63.2 | 56.8 | 58.3 | 47.3 |
| Missing                                                 | --   | 55.8 | 66.7 | 44.1 |
| <hr/>                                                   |      |      |      |      |
| VA health care use, past year <sup>2</sup> (%)          |      |      |      |      |
| None                                                    | 79.3 | 64.7 | 72.7 | 59.1 |
| Less than half of care                                  | 77.0 | 62.3 | 73.4 | 55.4 |
| More than half of care                                  | 74.7 | 58.8 | 67.9 | 52.1 |
| All care                                                | 75.7 | 56.6 | 65.3 | 49.5 |
| Missing                                                 | 26.4 | 16.9 | 21.3 | 12.0 |
| <hr/>                                                   |      |      |      |      |
| VA inpatient hospital stays, past year <sup>2</sup> (n) |      |      |      |      |
| None                                                    | 77.5 | 60.6 | 71.1 | 54.3 |
| 1–3                                                     | 72.3 | 53.1 | 60.7 | 45.5 |
| ≥ 4                                                     | 60.0 | 49.8 | 51.8 | 38.4 |
| Missing                                                 | 72.1 | 59.0 | 69.7 | 51.2 |
| <hr/>                                                   |      |      |      |      |
| Smoker <sup>2</sup>                                     |      |      |      |      |
| Never                                                   | 73.3 | 51.4 | 64.5 | 44.2 |
| Former                                                  | 77.4 | 63.4 | 70.5 | 55.9 |
| Current                                                 | 76.9 | 60.1 | 70.6 | 53.4 |
| Missing                                                 | 66.7 | 52.7 | 71.6 | 48.4 |
| <hr/>                                                   |      |      |      |      |
| Drinker- AUDIT-C <sup>2,5</sup> (%)                     |      |      |      |      |

|         |      |      |      |      |
|---------|------|------|------|------|
| Yes     | 80.3 | 58.5 | 73.5 | 53.4 |
| No      | 75.2 | 59.8 | 69.0 | 52.6 |
| Missing | 26.9 | 17.5 | 22.3 | 12.7 |

*Note:* All numbers reported in table represent percents. For example, 68.5% of male deployed officers returned a GW Survey. <sup>1</sup>Data source for gender, age (calculated as of 1/1/1991), race, ethnicity from MVP Core demographics file supplemented with VADIR. <sup>2</sup>Data source used for education, income, and health characteristics was the MVP Baseline Survey. <sup>3</sup>Data source used for marital status was CDW. <sup>4</sup>Data source used for deployment, enlisted/officer, service branch, rank and component was VADIR. <sup>5</sup>Drinker - based on the AUDIT-C: defined as a positive screen for a score of 4 or more for males and a score of 3 or more for females.
